# Supplementary material
Source: publisher site journal article supplement (https://www.spandidos-publications.com/6945/downloadSupplementary)
Supplement: Supplementary file 1 [file downloadSupplementary]

## Sheet: Sheet1
Table SI. Characteristics of patients with AML.
Patient no.	Patient information			Healthy donor information
	Sex	Age, years	Diagnosis	Sex	Age, years
1	Male	78	Newly diagnosed AML	Male	47
2	Female	70	Newly diagnosed AML	Female	22
3	Male	43	Newly diagnosed AML	Male	25
4	Female	20	Newly diagnosed AML	Female	27
5	Male	65	Newly diagnosed AML	Male	16
6	Female	51	Newly diagnosed AML	Female	48
7	Male	45	Newly diagnosed AML	Male	56
8	Female	29	Newly diagnosed AML	Female	43
9	Male	58	Newly diagnosed AML	Male	52
10	Male	41	Newly diagnosed AML	Female	22
11	Male	27	Recurrent AML	Male	41
12	Female	21	Recurrent AML	Female	22
13	Male	26	Recurrent AML	Male	23
14	Female	33	Recurrent AML	Female	23
15	Male	49	Recurrent AML	Male	37
16	Female	47	Recurrent AML	Female	34
17	Male	33	Recurrent AML	Male	49
18	Female	44	Recurrent AML	Male	48
19	Male	57	Recurrent AML	Male	17
20	Male	54	Recurrent AML	Male	17
AML, acute myeloid leukemia.
